# Supplementary material for: Phosphoproteins Involved in the Inhibition of Apoptosis and in Cell Survival in the Leiomyoma
Source: MDPI journal article supplement (doi:10.3390/jcm8050691), 2019-05-16
Supplement: s1 [file s1]

## Supplementary data

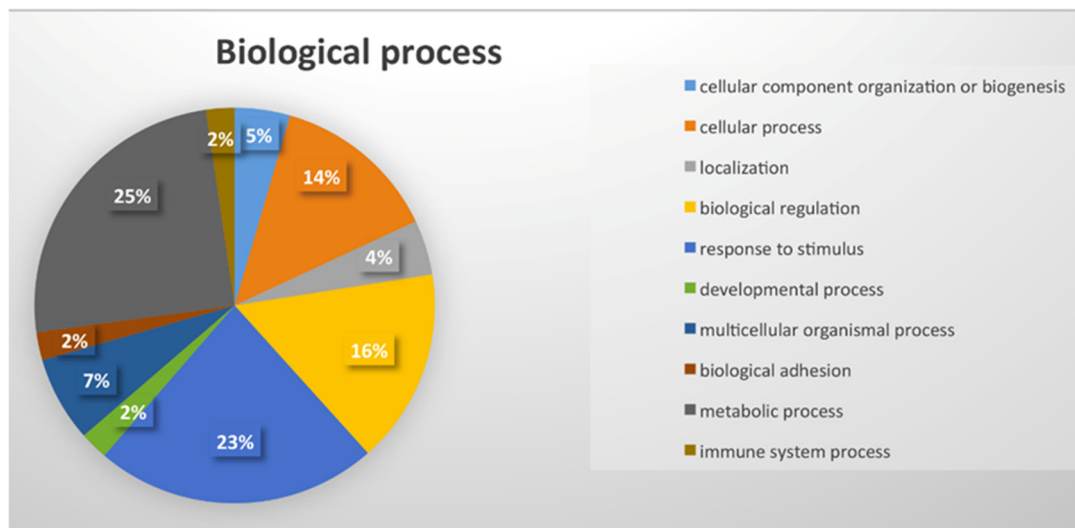

**Figure S1.** PANTHER classification of identified proteins in the leiomyoma according to their biological process.

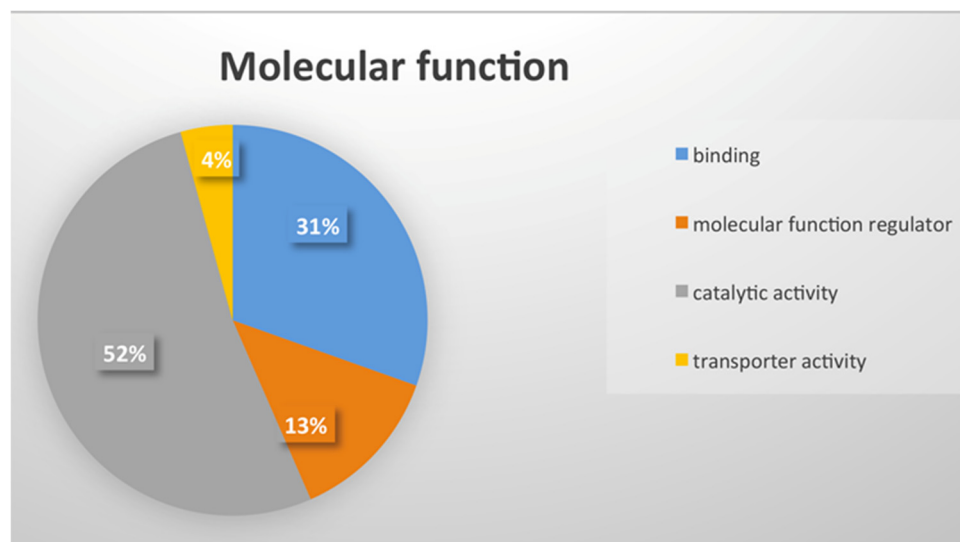

**Figure S2.** PANTHER classification of identified proteins in the leiomyoma according to their molecular function

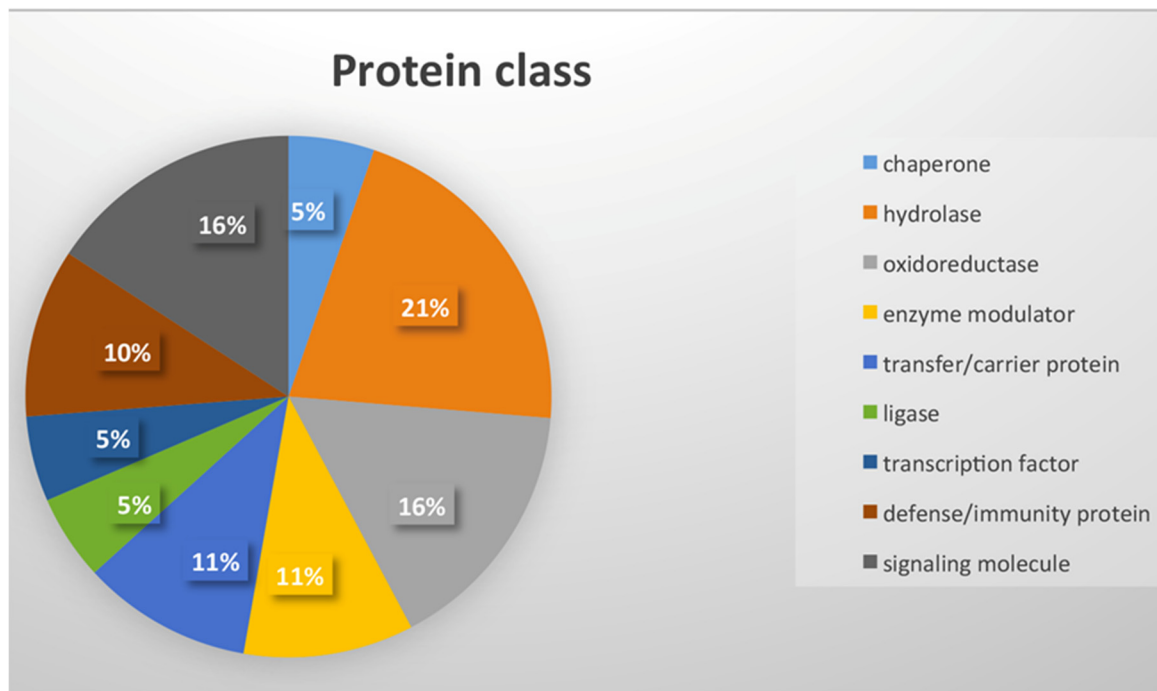

**Figure S3.** PANTHER classification of identified proteins in the leiomyoma according to their protein class.

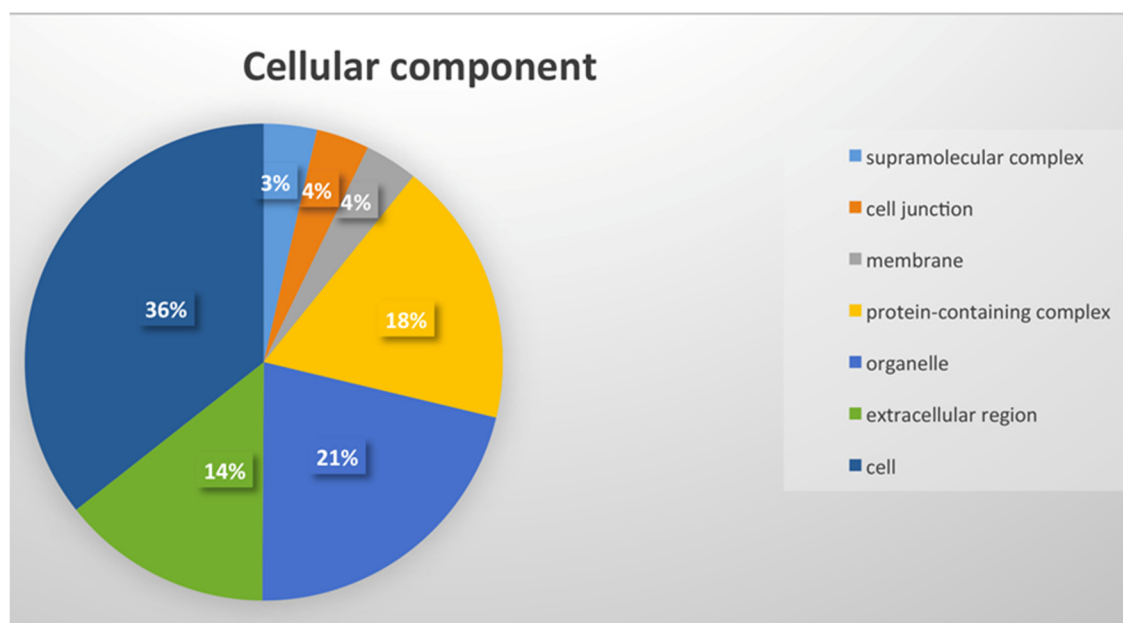

**Figure S4.** PANTHER classification of identified proteins in the leiomyoma according to their cellular component.

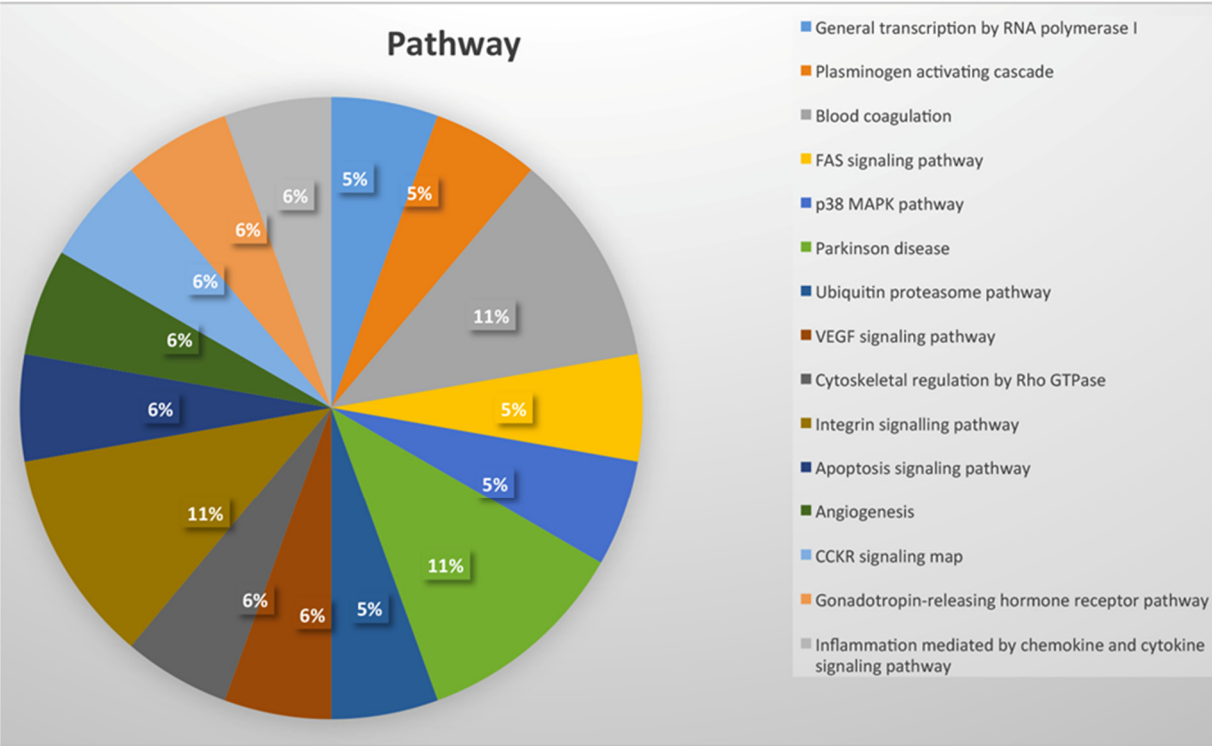

**Figure S5.** PANTHER classification of identified proteins in signaling pathways.

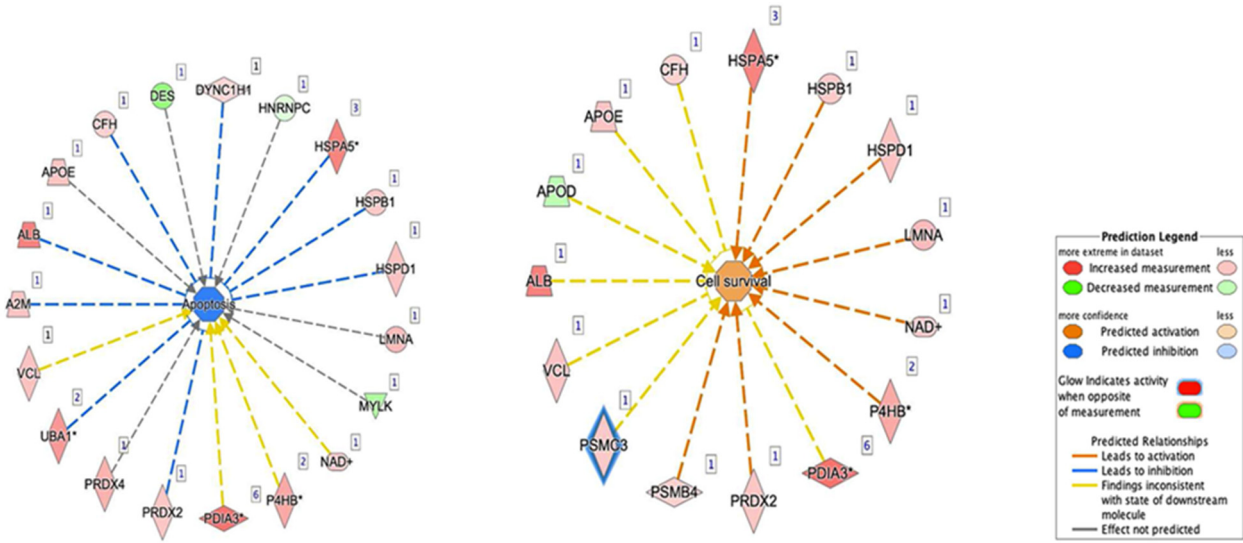

**Figure S6.** Network build up from one of the most significant bio-functions: 1. Apoptosis, 2. Cell survivor.
